# Supplementary material for: Tyrosine Kinase Inhibitors Play an Antiviral Action in Patients Affected by Chronic Myeloid Leukemia: A Possible Model Supporting Their Use in the Fight Against SARS-CoV-2
Source: Front Oncol. 2020 Sep 2;10:1428. doi: 10.3389/fonc.2020.01428 (PMC7493657; doi:10.3389/fonc.2020.01428)
Supplement: Supplementary file 1 [file Table_1.XLSX]

## Sheet: Foglio1
Probe Label,"Log2 fold change","std error (log2)","Lower confidence limit (log2)","Upper confidence limit (log2)","Linear fold change","Lower confidence limit (linear)","Upper confidence limit (linear)","P-value","BY.p.value","method","Gene.sets","Codeset.Name","Probe.Label","Analyte.Type","Is.Control","Control.Type","Probe.Annotation","KEGG.Pathways","Cell.Type","Official.Gene.Name","volcanocol"…
ADAM19-mRNA,0.428,0.311,-0.181,1.04,1.35,0.882,2.05,0.202,1,"lm.nb","ECM remodeling","NS_HS_MYELOID_V2.0","ADAM19","mRNA",0,"","ECM remodeling","","","ADAM19","azure4",1,1.37620578778135
ADAM8-mRNA,0.478,0.324,-0.158,1.11,1.39,0.896,2.16,0.175,1,"lm.nb","ECM remodeling","NS_HS_MYELOID_V2.0","ADAM8","mRNA",0,"","ECM remodeling","","","ADAM8","azure4",1,1.47530864197531
ADAMTS1-mRNA,1.68,1.81,-1.86,5.22,3.21,0.276,37.3,0.379,1,"Wald","ECM remodeling","NS_HS_MYELOID_V2.0","ADAMTS1","mRNA",0,"","ECM remodeling","","","ADAMTS1","azure4",1,0.92817679558011
ANGPT1-mRNA,-0.111,2.18,-4.38,4.15,0.926,0.0482,17.8,0.961,1,"Wald","Angiogenesis, Cell Migration and Adhesion, Cytokine Signaling, Fc Receptor Signaling, Growth Factor Signaling, Lymphocyte activation","NS_HS_MYELOID_V2.0","ANGPT1","mRNA",0,"","Lymphocyte activation	Growth Factor Signaling	Fc Receptor Signaling	Cytokine Signaling	Cell Migration and Adhesion	Angiogenesis","hsa04014	hsa04015	hsa04066	hsa04151	hsa05323","","ANGPT1","azure4",1,-0.0509174311926605
BIRC3-mRNA,0.734,0.338,0.0712,1.4,1.66,1.05,2.63,0.0581,1,"lm.nb","Cytokine Signaling, Pathogen Response, TLR signaling","NS_HS_MYELOID_V2.0","BIRC3","mRNA",0,"","TLR signaling	Pathogen Response	Cytokine Signaling","hsa04064	hsa04120	hsa04210	hsa04510	hsa04621	hsa04668	hsa05145	hsa05200	hsa05202	hsa05222","","BIRC3","azure4",1,2.17159763313609
BTK-mRNA,-0.847,0.121,-1.08,-0.609,0.556,0.471,0.656,6.54e-05,0.00755,"lm.nb","Fc Receptor Signaling, Lymphocyte activation, TLR signaling","NS_HS_MYELOID_V2.0","BTK","mRNA",0,"","TLR signaling	Lymphocyte activation	Fc Receptor Signaling","hsa04064	hsa04380	hsa04611	hsa04662	hsa04664	hsa05340","","BTK","slateblue1",16,-7
C1QB-mRNA,-0.0909,1.1,-2.25,2.07,0.939,0.21,4.19,0.936,1,"Wald","Complement Activation","NS_HS_MYELOID_V2.0","C1QB","mRNA",0,"","Complement Activation","hsa04610	hsa05020	hsa05133	hsa05142	hsa05150	hsa05322","","C1QB","azure4",1,-0.0826363636363636
C3-mRNA,-0.177,1.88,-3.86,3.5,0.885,0.069,11.3,0.927,1,"Wald","Complement Activation","NS_HS_MYELOID_V2.0","C3","mRNA",0,"","Complement Activation","hsa04145	hsa04610	hsa05133	hsa05134	hsa05140	hsa05142	hsa05150	hsa05152	hsa05168	hsa05203	hsa05322","","C3","azure4",1,-0.0941489361702128
C5-mRNA,-0.43,4.55,-9.34,8.48,0.742,0.00154,357,0.927,1,"Wald","Complement Activation","NS_HS_MYELOID_V2.0","C5","mRNA",0,"","Complement Activation","hsa04610	hsa05020	hsa05133	hsa05150	hsa05168	hsa05322","","C5","azure4",1,-0.0945054945054945
C5AR1-mRNA,0.313,0.363,-0.399,1.03,1.24,0.758,2.04,0.411,1,"lm.nb","Complement Activation","NS_HS_MYELOID_V2.0","C5AR1","mRNA",0,"","Complement Activation","hsa04080	hsa04610	hsa05150","","C5AR1","azure4",1,0.862258953168044
CCL4-mRNA,0.705,0.628,-0.527,1.94,1.63,0.694,3.83,0.291,1,"lm.nb","Chemokine signaling, Pathogen Response, TLR signaling","NS_HS_MYELOID_V2.0","CCL4","mRNA",0,"","TLR signaling	Pathogen Response	Chemokine signaling","hsa04060	hsa04062	hsa04064	hsa04620	hsa04623	hsa05132","","CCL4","azure4",1,1.12261146496815
CCL5-mRNA,1.83,0.458,0.937,2.73,3.57,1.92,6.64,0.00307,0.119,"lm.nb","Chemokine signaling, Cytokine Signaling, Pathogen Response, TLR signaling","NS_HS_MYELOID_V2.0","CCL5","mRNA",0,"","TLR signaling	Pathogen Response	Cytokine Signaling	Chemokine signaling","hsa04060	hsa04062	hsa04620	hsa04621	hsa04623	hsa04668	hsa05020	hsa05120	hsa05142	hsa05164	hsa05168	hsa05323","","CCL5","slateblue4",16,3.99563318777293
CCR2-mRNA,0.327,0.32,-0.3,0.953,1.25,0.812,1.94,0.333,1,"lm.nb","Chemokine signaling","NS_HS_MYELOID_V2.0","CCR2","mRNA",0,"","Chemokine signaling","hsa04060	hsa04062","","CCR2","azure4",1,1.021875
CCR4-mRNA,1.01,0.29,0.446,1.58,2.02,1.36,2.99,0.00674,0.218,"lm.nb","Chemokine signaling, TH2 Activation","NS_HS_MYELOID_V2.0","CCR4","mRNA",0,"","TH2 Activation	Chemokine signaling","hsa04060	hsa04062	hsa05203","","CCR4","slateblue4",16,3.48275862068966
CCR5-mRNA,1.45,1.22,-0.942,3.85,2.74,0.521,14.4,0.269,1,"Wald","Chemokine signaling","NS_HS_MYELOID_V2.0","CCR5","mRNA",0,"","Chemokine signaling","hsa04060	hsa04062	hsa04144	hsa05145	hsa05203","","CCR5","azure4",1,1.18852459016393
CD28-mRNA,1.51,0.389,0.75,2.27,2.85,1.68,4.83,0.00367,0.136,"lm.nb","Cell Migration and Adhesion, Fc Receptor Signaling, Growth Factor Signaling, Lymphocyte activation, T-cell Activation and Checkpoint Signaling","NS_HS_MYELOID_V2.0","CD28","mRNA",0,"","T-cell Activation and Checkpoint Signaling	Lymphocyte activation	Growth Factor Signaling	Fc Receptor Signaling	Cell Migration and Adhesion","hsa04514	hsa04660	hsa04672	hsa04940	hsa05162	hsa05320	hsa05322	hsa05323	hsa05330	hsa05332	hsa05416","","CD28","slateblue4",16,3.88174807197943
CD40-mRNA,0.151,1.7,-3.18,3.48,1.11,0.11,11.2,0.931,1,"Wald","Cell Migration and Adhesion, Lymphocyte activation, TH1 Activation, TLR signaling","NS_HS_MYELOID_V2.0","CD40","mRNA",0,"","TLR signaling	TH1 Activation	Lymphocyte activation	Cell Migration and Adhesion","hsa04060	hsa04064	hsa04514	hsa04620	hsa04672	hsa05144	hsa05145	hsa05166	hsa05169	hsa05202	hsa05310	hsa05320	hsa05322	hsa05330	hsa05340	hsa05416","","CD40","azure4",1,0.0888235294117647
CD70-mRNA,-0.0861,6.94,-13.7,13.5,0.942,7.58e-05,11700,0.99,1,"Wald","T-cell Activation and Checkpoint Signaling","NS_HS_MYELOID_V2.0","CD70","mRNA",0,"","T-cell Activation and Checkpoint Signaling","hsa04060","","CD70","azure4",1,-0.0124063400576369
CD86-mRNA,0.783,0.354,0.089,1.48,1.72,1.06,2.78,0.0543,1,"lm.nb","Cell Migration and Adhesion, Fc Receptor Signaling, Growth Factor Signaling, Lymphocyte activation, T-cell Activation and Checkpoint Signaling, TLR signaling","NS_HS_MYELOID_V2.0","CD86","mRNA",0,"","TLR signaling	T-cell Activation and Checkpoint Signaling	Lymphocyte activation	Growth Factor Signaling	Fc Receptor Signaling	Cell Migration and Adhesion","hsa04514	hsa04620	hsa04672	hsa04940	hsa05202	hsa05320	hsa05322	hsa05323	hsa05330	hsa05332	hsa05416","","CD86","azure4",1,2.21186440677966
CX3CR1-mRNA,1.91,0.59,0.752,3.07,3.76,1.68,8.38,0.0103,0.287,"lm.nb","Chemokine signaling","NS_HS_MYELOID_V2.0","CX3CR1","mRNA",0,"","Chemokine signaling","hsa04060	hsa04062","","CX3CR1","slateblue4",16,3.23728813559322
CXCL1-mRNA,0.288,0.553,-0.796,1.37,1.22,0.576,2.59,0.616,1,"lm.nb","Chemokine signaling, Cytokine Signaling, Pathogen Response","NS_HS_MYELOID_V2.0","CXCL1","mRNA",0,"","Pathogen Response	Cytokine Signaling	Chemokine signaling","hsa04060	hsa04062	hsa04621	hsa04668	hsa05120	hsa05132	hsa05134	hsa05146	hsa05323","","CXCL1","azure4",1,0.520795660036166
CXCL2-mRNA,-0.979,0.438,-1.84,-0.12,0.507,0.28,0.92,0.0524,1,"lm.nb","Chemokine signaling, Cytokine Signaling, Pathogen Response","NS_HS_MYELOID_V2.0","CXCL2","mRNA",0,"","Pathogen Response	Cytokine Signaling	Chemokine signaling","hsa04060	hsa04062	hsa04064	hsa04621	hsa04668	hsa05132	hsa05134","","CXCL2","azure4",1,-2.2351598173516
CXCL3-mRNA,-1.72,1.63,-4.91,1.47,0.303,0.0332,2.77,0.321,1,"Wald","Chemokine signaling, Cytokine Signaling","NS_HS_MYELOID_V2.0","CXCL3","mRNA",0,"","Cytokine Signaling	Chemokine signaling","hsa04060	hsa04062	hsa04668	hsa05132	hsa05134","","CXCL3","azure4",1,-1.05521472392638
CXCL8-mRNA,0.0584,0.812,-1.53,1.65,1.04,0.346,3.14,0.944,1,"lm.nb","Chemokine signaling, Pathogen Response, TLR signaling","NS_HS_MYELOID_V2.0","CXCL8","mRNA",0,"","TLR signaling	Pathogen Response	Chemokine signaling","hsa04060	hsa04062	hsa04064	hsa04072	hsa04620	hsa04621	hsa04622	hsa04932	hsa04933	hsa05120	hsa05131	hsa05132	hsa05133	hsa05134	hsa05142	hsa05144	hsa05146	hsa05160	hsa05161	hsa05164	hsa05200	hsa05202	hsa05219	hsa05323","","CXCL8","azure4",1,0.0719211822660099
CXCL9-mRNA,0.273,1.89,-3.42,3.97,1.21,0.0932,15.7,0.888,1,"Wald","Chemokine signaling, TLR signaling","NS_HS_MYELOID_V2.0","CXCL9","mRNA",0,"","TLR signaling	Chemokine signaling","hsa04060	hsa04062	hsa04620","","CXCL9","azure4",1,0.144444444444444
CXCR3-mRNA,1.43,2.01,-2.51,5.37,2.69,0.176,41.3,0.497,1,"Wald","Chemokine signaling, TH1 Activation","NS_HS_MYELOID_V2.0","CXCR3","mRNA",0,"","TH1 Activation	Chemokine signaling","hsa04060	hsa04062","","CXCR3","azure4",1,0.711442786069652
CXCR4-mRNA,0.218,0.207,-0.187,0.623,1.16,0.878,1.54,0.319,1,"lm.nb","Chemokine signaling, TH2 Activation","NS_HS_MYELOID_V2.0","CXCR4","mRNA",0,"","TH2 Activation	Chemokine signaling","hsa04060	hsa04062	hsa04144	hsa04360	hsa04670	hsa04672	hsa05200","","CXCR4","azure4",1,1.05314009661836
FADD-mRNA,0.139,2.55,-4.86,5.14,1.1,0.0345,35.1,0.958,1,"Wald","Cytokine Signaling, Pathogen Response, TLR signaling","NS_HS_MYELOID_V2.0","FADD","mRNA",0,"","TLR signaling	Pathogen Response	Cytokine Signaling","hsa04210	hsa04620	hsa04622	hsa04668	hsa05010	hsa05142	hsa05152	hsa05161	hsa05168	hsa05200","","FADD","azure4",1,0.0545098039215686
FGFR1-mRNA,-1.49,0.284,-2.04,-0.931,0.357,0.243,0.525,0.000535,0.0335,"lm.nb","Angiogenesis, Cytokine Signaling, Fc Receptor Signaling, Growth Factor Signaling, Lymphocyte activation","NS_HS_MYELOID_V2.0","FGFR1","mRNA",0,"","Lymphocyte activation	Growth Factor Signaling	Fc Receptor Signaling	Cytokine Signaling	Angiogenesis","hsa04010	hsa04014	hsa04015	hsa04151	hsa04520	hsa04550	hsa04810	hsa05200	hsa05205	hsa05215	hsa05218	hsa05230","","FGFR1","slateblue2",16,-5.24647887323944
FYN-mRNA,1.62,0.269,1.09,2.15,3.07,2.13,4.43,2e-04,0.0149,"lm.nb","Angiogenesis, Antigen Presentation, Cell Migration and Adhesion, Cytokine Signaling, Fc Receptor Signaling, Growth Factor Signaling, Lymphocyte activation, T-cell Activation and Checkpoint Signaling","NS_HS_MYELOID_V2.0","FYN","mRNA",0,"","T-cell Activation and Checkpoint Signaling	Lymphocyte activation	Growth Factor Signaling	Fc Receptor Signaling	Cytokine Signaling	Cell Migration and Adhesion	Antigen Presentation	Angiogenesis","hsa04071	hsa04072	hsa04360	hsa04380	hsa04510	hsa04520	hsa04611	hsa04650	hsa04660	hsa04664	hsa04725	hsa05020	hsa05130	hsa05162	hsa05416","","FYN","slateblue2",16,6.02230483271375
ICAM1-mRNA,0.549,0.44,-0.314,1.41,1.46,0.804,2.66,0.244,1,"lm.nb","Cell Migration and Adhesion, Cytokine Signaling, ECM remodeling, Interferon Signaling, Lymphocyte activation","NS_HS_MYELOID_V2.0","ICAM1","mRNA",0,"","Lymphocyte activation	Interferon Signaling	ECM remodeling	Cytokine Signaling	Cell Migration and Adhesion","hsa04064	hsa04514	hsa04650	hsa04668	hsa04670	hsa04933	hsa05143	hsa05144	hsa05150	hsa05164	hsa05166	hsa05169	hsa05323	hsa05416","","ICAM1","azure4",1,1.24772727272727
IFNA2-mRNA,-0.557,2.94,-6.32,5.2,0.68,0.0125,36.8,0.854,1,"Wald","Growth Factor Signaling, Interferon Signaling, Pathogen Response, TLR signaling","NS_HS_MYELOID_V2.0","IFNA2","mRNA",0,"","TLR signaling	Pathogen Response	Interferon Signaling	Growth Factor Signaling","hsa04060	hsa04151	hsa04620	hsa04622	hsa04623	hsa04630	hsa04650	hsa05152	hsa05160	hsa05161	hsa05162	hsa05164	hsa05168	hsa05320","","IFNA2","azure4",1,-0.189455782312925
IFNAR1-mRNA,0.646,0.251,0.154,1.14,1.56,1.11,2.2,0.0299,0.674,"lm.nb","Growth Factor Signaling, Interferon Signaling, TLR signaling","NS_HS_MYELOID_V2.0","IFNAR1","mRNA",0,"","TLR signaling	Interferon Signaling	Growth Factor Signaling","hsa04060	hsa04151	hsa04380	hsa04620	hsa04630	hsa04650	hsa05160	hsa05161	hsa05162	hsa05164	hsa05168","","IFNAR1","azure4",1,2.57370517928287
IFNAR2-mRNA,0.62,0.252,0.126,1.11,1.54,1.09,2.17,0.0361,0.783,"lm.nb","Growth Factor Signaling, Interferon Signaling, TLR signaling","NS_HS_MYELOID_V2.0","IFNAR2","mRNA",0,"","TLR signaling	Interferon Signaling	Growth Factor Signaling","hsa04060	hsa04151	hsa04380	hsa04620	hsa04630	hsa04650	hsa05160	hsa05162	hsa05164	hsa05168","","IFNAR2","azure4",1,2.46031746031746
IFNG-mRNA,1.42,1.19,-0.915,3.75,2.67,0.53,13.4,0.268,1,"Wald","Antigen Presentation, Growth Factor Signaling, Interferon Signaling, TH1 Activation","NS_HS_MYELOID_V2.0","IFNG","mRNA",0,"","TH1 Activation	Interferon Signaling	Growth Factor Signaling	Antigen Presentation","hsa04060	hsa04066	hsa04350	hsa04380	hsa04612	hsa04630	hsa04650	hsa04660	hsa04940	hsa05132	hsa05140	hsa05142	hsa05143	hsa05144	hsa05145	hsa05146	hsa05152	hsa05162	hsa05164	hsa05168	hsa05169	hsa05321	hsa05322	hsa05323	hsa05330	hsa05332","","IFNG","azure4",1,1.19327731092437
IFNGR1-mRNA,0.804,0.22,0.374,1.23,1.75,1.3,2.35,0.00523,0.178,"lm.nb","Growth Factor Signaling, Interferon Signaling, TH1 Activation, TH2 Activation","NS_HS_MYELOID_V2.0","IFNGR1","mRNA",0,"","TH2 Activation	TH1 Activation	Interferon Signaling	Growth Factor Signaling","hsa04060	hsa04066	hsa04380	hsa04630	hsa04650	hsa05132	hsa05140	hsa05142	hsa05145	hsa05152	hsa05162	hsa05164	hsa05168	hsa05321","","IFNGR1","slateblue4",16,3.65454545454545
IKBKE-mRNA,0.728,0.161,0.413,1.04,1.66,1.33,2.06,0.00144,0.072,"lm.nb","Pathogen Response, TLR signaling","NS_HS_MYELOID_V2.0","IKBKE","mRNA",0,"","TLR signaling	Pathogen Response","hsa04620	hsa04622	hsa04623	hsa05160	hsa05161	hsa05162	hsa05164	hsa05168","","IKBKE","slateblue3",16,4.52173913043478
IL10RA-mRNA,0.955,0.207,0.549,1.36,1.94,1.46,2.57,0.00128,0.066,"lm.nb","Cytokine Signaling, Growth Factor Signaling","NS_HS_MYELOID_V2.0","IL10RA","mRNA",0,"","Growth Factor Signaling	Cytokine Signaling","hsa04060	hsa04630	hsa05145	hsa05152	hsa05169","","IL10RA","slateblue3",16,4.61352657004831
IL12A-mRNA,0.642,2.59,-4.44,5.73,1.56,0.046,53,0.811,1,"Wald","Cytokine Signaling, Growth Factor Signaling, Pathogen Response, TH1 Activation, TLR signaling","NS_HS_MYELOID_V2.0","IL12A","mRNA",0,"","TLR signaling	TH1 Activation	Pathogen Response	Growth Factor Signaling	Cytokine Signaling","hsa04060	hsa04620	hsa04622	hsa04630	hsa04940	hsa05133	hsa05134	hsa05140	hsa05142	hsa05143	hsa05144	hsa05145	hsa05146	hsa05152	hsa05162	hsa05164	hsa05168	hsa05321	hsa05330","","IL12A","azure4",1,0.247876447876448
IL15-mRNA,0.765,2.58,-4.28,5.81,1.7,0.0513,56.3,0.774,1,"Wald","Cytokine Signaling, Growth Factor Signaling","NS_HS_MYELOID_V2.0","IL15","mRNA",0,"","Growth Factor Signaling	Cytokine Signaling","hsa04060	hsa04630	hsa04668	hsa04672	hsa05166	hsa05168	hsa05323","","IL15","azure4",1,0.296511627906977
IL17RA-mRNA,0.0234,0.231,-0.429,0.476,1.02,0.743,1.39,0.921,1,"lm.nb","Cytokine Signaling","NS_HS_MYELOID_V2.0","IL17RA","mRNA",0,"","Cytokine Signaling","hsa04060","","IL17RA","azure4",1,0.101298701298701
IL18-mRNA,-2.14,0.342,-2.81,-1.47,0.227,0.142,0.361,0.000149,0.0122,"lm.nb","Cytokine Signaling, Pathogen Response, TH1 Activation","NS_HS_MYELOID_V2.0","IL18","mRNA",0,"","TH1 Activation	Pathogen Response	Cytokine Signaling","hsa04060	hsa04621	hsa04623	hsa05132	hsa05134	hsa05143	hsa05144	hsa05152	hsa05164	hsa05321	hsa05323","","IL18","slateblue2",16,-6.25730994152047
IL18R1-mRNA,0.612,0.298,0.0276,1.2,1.53,1.02,2.29,0.0703,1,"lm.nb","Cytokine Signaling, TH1 Activation","NS_HS_MYELOID_V2.0","IL18R1","mRNA",0,"","TH1 Activation	Cytokine Signaling","hsa04060	hsa04668	hsa05321","","IL18R1","azure4",1,2.05369127516779
IL1B-mRNA,0.482,0.598,-0.691,1.65,1.4,0.62,3.15,0.441,1,"lm.nb","Antigen Presentation, Cytokine Signaling, Growth Factor Signaling, Lymphocyte activation, Pathogen Response, TLR signaling","NS_HS_MYELOID_V2.0","IL1B","mRNA",0,"","TLR signaling	Pathogen Response	Lymphocyte activation	Growth Factor Signaling	Cytokine Signaling	Antigen Presentation","hsa04010	hsa04060	hsa04064	hsa04210	hsa04380	hsa04620	hsa04621	hsa04623	hsa04640	hsa04668	hsa04750	hsa04932	hsa04933	hsa04940	hsa05010	hsa05020	hsa05132	hsa05133	hsa05134	hsa05140	hsa05142	hsa05143	hsa05144	hsa05146	hsa05152	hsa05162	hsa05164	hsa05168	hsa05321	hsa05323	hsa05332","","IL1B","azure4",1,0.806020066889632
IL1R2-mRNA,0.609,0.434,-0.242,1.46,1.53,0.845,2.75,0.194,1,"lm.nb","Cytokine Signaling, Growth Factor Signaling","NS_HS_MYELOID_V2.0","IL1R2","mRNA",0,"","Growth Factor Signaling	Cytokine Signaling","hsa04010	hsa04060	hsa04640	hsa05146	hsa05166	hsa05202","","IL1R2","azure4",1,1.40322580645161
IL1RL1-mRNA,-0.954,0.677,-2.28,0.373,0.516,0.206,1.3,0.193,1,"lm.nb","Cytokine Signaling","NS_HS_MYELOID_V2.0","IL1RL1","mRNA",0,"","Cytokine Signaling","","","IL1RL1","azure4",1,-1.40915805022157
IL4R-mRNA,-0.124,0.281,-0.674,0.427,0.918,0.627,1.34,0.67,1,"lm.nb","Cytokine Signaling, Growth Factor Signaling","NS_HS_MYELOID_V2.0","IL4R","mRNA",0,"","Growth Factor Signaling	Cytokine Signaling","hsa04060	hsa04151	hsa04630	hsa04640	hsa05321","","IL4R","azure4",1,-0.441281138790036
IL5-mRNA,0.116,1.5,-2.81,3.05,1.08,0.142,8.26,0.94,1,"Wald","Angiogenesis, Cytokine Signaling, Fc Receptor Signaling, Growth Factor Signaling, Lymphocyte activation, TH2 Activation","NS_HS_MYELOID_V2.0","IL5","mRNA",0,"","TH2 Activation	Lymphocyte activation	Growth Factor Signaling	Fc Receptor Signaling	Cytokine Signaling	Angiogenesis","hsa04060	hsa04630	hsa04640	hsa04660	hsa04664	hsa04672	hsa05310	hsa05320	hsa05321	hsa05330","","IL5","azure4",1,0.0773333333333333
IL5RA-mRNA,0.259,1.96,-3.58,4.1,1.2,0.0835,17.1,0.898,1,"Wald","Angiogenesis, Cytokine Signaling, Fc Receptor Signaling, Growth Factor Signaling, Lymphocyte activation","NS_HS_MYELOID_V2.0","IL5RA","mRNA",0,"","Lymphocyte activation	Growth Factor Signaling	Fc Receptor Signaling	Cytokine Signaling	Angiogenesis","hsa04060	hsa04630	hsa04640","","IL5RA","azure4",1,0.132142857142857
IL6R-mRNA,0.154,0.273,-0.381,0.689,1.11,0.768,1.61,0.586,1,"lm.nb","Cytokine Signaling, Growth Factor Signaling","NS_HS_MYELOID_V2.0","IL6R","mRNA",0,"","Growth Factor Signaling	Cytokine Signaling","hsa04060	hsa04066	hsa04151	hsa04630	hsa04640	hsa04932","","IL6R","azure4",1,0.564102564102564
JAK3-mRNA,1.16,0.343,0.485,1.83,2.23,1.4,3.55,0.00819,0.25,"lm.nb","Angiogenesis, Chemokine signaling, Cytokine Signaling, Fc Receptor Signaling, Growth Factor Signaling, Lymphocyte activation","NS_HS_MYELOID_V2.0","JAK3","mRNA",0,"","Lymphocyte activation	Growth Factor Signaling	Fc Receptor Signaling	Cytokine Signaling	Chemokine signaling	Angiogenesis","hsa04062	hsa04151	hsa04550	hsa04630	hsa05162	hsa05166	hsa05169	hsa05203	hsa05340","","JAK3","slateblue4",16,3.38192419825073
JUN-mRNA,-0.996,0.65,-2.27,0.277,0.501,0.207,1.21,0.16,1,"lm.nb","Cytokine Signaling, Fc Receptor Signaling, Growth Factor Signaling, Lymphocyte activation, TLR signaling","NS_HS_MYELOID_V2.0","JUN","mRNA",0,"","TLR signaling	Lymphocyte activation	Growth Factor Signaling	Fc Receptor Signaling	Cytokine Signaling","hsa04010	hsa04012	hsa04024	hsa04310	hsa04380	hsa04510	hsa04620	hsa04660	hsa04662	hsa04668	hsa04722	hsa04912	hsa04915	hsa04921	hsa04932	hsa04933	hsa05120	hsa05132	hsa05133	hsa05140	hsa05142	hsa05161	hsa05164	hsa05166	hsa05168	hsa05169	hsa05200	hsa05203	hsa05210	hsa05211	hsa05231	hsa05321	hsa05323","","JUN","azure4",1,-1.53230769230769
KIT-mRNA,-1.36,1.02,-3.36,0.639,0.39,0.0976,1.56,0.219,1,"Wald","Angiogenesis, Cytokine Signaling, Fc Receptor Signaling, Growth Factor Signaling, Lymphocyte activation","NS_HS_MYELOID_V2.0","KIT","mRNA",0,"","Lymphocyte activation	Growth Factor Signaling	Fc Receptor Signaling	Cytokine Signaling	Angiogenesis","hsa04014	hsa04015	hsa04060	hsa04072	hsa04144	hsa04151	hsa04640	hsa04916	hsa05200	hsa05221	hsa05230","","KIT","azure4",1,-1.33333333333333
MAP2K4-mRNA,0.542,0.26,0.0318,1.05,1.46,1.02,2.07,0.067,1,"lm.nb","Cytokine Signaling, Fc Receptor Signaling, Growth Factor Signaling, Lymphocyte activation, TLR signaling","NS_HS_MYELOID_V2.0","MAP2K4","mRNA",0,"","TLR signaling	Lymphocyte activation	Growth Factor Signaling	Fc Receptor Signaling	Cytokine Signaling","hsa04010	hsa04012	hsa04620	hsa04664	hsa04668	hsa04912	hsa05120	hsa05142	hsa05161	hsa05164	hsa05166	hsa05169","","MAP2K4","azure4",1,2.08461538461538
MMP8-mRNA,-5.34,0.533,-6.38,-4.29,0.0248,0.012,0.0511,3.53e-06,0.00149,"lm.nb","ECM remodeling","NS_HS_MYELOID_V2.0","MMP8","mRNA",0,"","ECM remodeling","","","MMP8","slateblue1",16,-10.0187617260788
MMP9-mRNA,-3.4,0.431,-4.24,-2.55,0.0948,0.0528,0.17,2.49e-05,0.00366,"lm.nb","Cytokine Signaling, ECM remodeling","NS_HS_MYELOID_V2.0","MMP9","mRNA",0,"","ECM remodeling	Cytokine Signaling","hsa04668	hsa04670	hsa04915	hsa05161	hsa05200	hsa05202	hsa05205	hsa05206	hsa05219","","MMP9","slateblue1",16,-7.88863109048724
NFATC1-mRNA,0.422,0.23,-0.0298,0.873,1.34,0.98,1.83,0.1,1,"lm.nb","Antigen Presentation, Fc Receptor Signaling, Growth Factor Signaling, Lymphocyte activation","NS_HS_MYELOID_V2.0","NFATC1","mRNA",0,"","Lymphocyte activation	Growth Factor Signaling	Fc Receptor Signaling	Antigen Presentation","hsa04010	hsa04022	hsa04024	hsa04310	hsa04380	hsa04650	hsa04660	hsa04662	hsa04921	hsa04933	hsa05161	hsa05166	hsa05321","","NFATC1","azure4",1,1.83478260869565
NFATC2-mRNA,1.76,0.333,1.11,2.41,3.39,2.15,5.33,0.000504,0.0326,"lm.nb","Antigen Presentation, Fc Receptor Signaling, Growth Factor Signaling, Lymphocyte activation","NS_HS_MYELOID_V2.0","NFATC2","mRNA",0,"","Lymphocyte activation	Growth Factor Signaling	Fc Receptor Signaling	Antigen Presentation","hsa04022	hsa04310	hsa04360	hsa04370	hsa04380	hsa04650	hsa04660	hsa04662	hsa04921	hsa05161	hsa05166","","NFATC2","slateblue2",16,5.28528528528529
NFKB1-mRNA,0.126,0.0986,-0.0672,0.319,1.09,0.954,1.25,0.233,1,"lm.nb","Antigen Presentation, Chemokine signaling, Cytokine Signaling, Fc Receptor Signaling, Growth Factor Signaling, Lymphocyte activation, Pathogen Response, TLR signaling","NS_HS_MYELOID_V2.0","NFKB1","mRNA",0,"","TLR signaling	Pathogen Response	Lymphocyte activation	Growth Factor Signaling	Fc Receptor Signaling	Cytokine Signaling	Chemokine signaling	Antigen Presentation","hsa04010	hsa04014	hsa04024	hsa04062	hsa04064	hsa04066	hsa04071	hsa04151	hsa04210	hsa04211	hsa04380	hsa04620	hsa04621	hsa04622	hsa04623	hsa04660	hsa04662	hsa04668	hsa04722	hsa04917	hsa04920	hsa04931	hsa04932	hsa04933	hsa05120	hsa05131	hsa05132	hsa05133	hsa05134	hsa05140	hsa05142	hsa05145	hsa05146	hsa05152	hsa05160	hsa05161	hsa05162	hsa05164	hsa05166	hsa05168	hsa05169	hsa05200	hsa05202
NFKBIA-mRNA,-0.491,0.485,-1.44,0.459,0.712,0.368,1.37,0.338,1,"lm.nb","Antigen Presentation, Chemokine signaling, Cytokine Signaling, Fc Receptor Signaling, Growth Factor Signaling, Lymphocyte activation, Pathogen Response, TLR signaling","NS_HS_MYELOID_V2.0","NFKBIA","mRNA",0,"","TLR signaling	Pathogen Response	Lymphocyte activation	Growth Factor Signaling	Fc Receptor Signaling	Cytokine Signaling	Chemokine signaling	Antigen Presentation","hsa04024	hsa04062	hsa04064	hsa04210	hsa04380	hsa04620	hsa04621	hsa04622	hsa04623	hsa04660	hsa04662	hsa04668	hsa04722	hsa04920	hsa04931	hsa05120	hsa05131	hsa05134	hsa05140	hsa05142	hsa05145	hsa05160	hsa05161	hsa05162	hsa05164	hsa05166	hsa05168	hsa05169	hsa05200	hsa05203	hsa05215	hsa05220	hsa05222","","NFKBIA","azure4",1,-1.01237113402062
NOD2-mRNA,0.817,0.375,0.0818,1.55,1.76,1.06,2.93,0.0573,1,"lm.nb","Cytokine Signaling, Pathogen Response, TLR signaling","NS_HS_MYELOID_V2.0","NOD2","mRNA",0,"","TLR signaling	Pathogen Response	Cytokine Signaling","hsa04621	hsa04668	hsa05131	hsa05152	hsa05321","","NOD2","azure4",1,2.17866666666667
PF4-mRNA,-0.655,0.613,-1.86,0.546,0.635,0.276,1.46,0.313,1,"lm.nb","Cell Migration and Adhesion, Chemokine signaling","NS_HS_MYELOID_V2.0","PF4","mRNA",0,"","Chemokine signaling	Cell Migration and Adhesion","hsa04060	hsa04062","","PF4","azure4",1,-1.06851549755302
PIK3CG-mRNA,-0.358,0.167,-0.686,-0.0312,0.78,0.622,0.979,0.0603,1,"lm.nb","Chemokine signaling, Cytokine Signaling, Growth Factor Signaling, Metabolism, TLR signaling","NS_HS_MYELOID_V2.0","PIK3CG","mRNA",0,"","TLR signaling	Metabolism	Growth Factor Signaling	Cytokine Signaling	Chemokine signaling","hsa04012	hsa04014	hsa04015	hsa04022	hsa04024	hsa04062	hsa04066	hsa04068	hsa04071	hsa04072	hsa04150	hsa04151	hsa04152	hsa04210	hsa04211	hsa04261	hsa04370	hsa04380	hsa04510	hsa04550	hsa04611	hsa04620	hsa04630	hsa04650	hsa04660	hsa04662	hsa04664	hsa04666	hsa04668	hsa04670	hsa04722	hsa04725	hsa04750	hsa04810	hsa04910	hsa04914	hsa04915	hsa04917	hsa04919	hsa04921	hsa04923	hsa04930	hsa04931	hsa04932	hsa04933	hsa05100
RHOG-mRNA,-0.0131,0.181,-0.368,0.342,0.991,0.775,1.27,0.944,1,"lm.nb","Cell Cycle and Apoptosis, Cell Migration and Adhesion, Growth Factor Signaling","NS_HS_MYELOID_V2.0","RHOG","mRNA",0,"","Growth Factor Signaling	Cell Migration and Adhesion	Cell Cycle and Apoptosis","hsa05100	hsa05131	hsa05132","","RHOG","azure4",1,-0.0723756906077348
STAT5A-mRNA,0.455,0.0873,0.284,0.626,1.37,1.22,1.54,0.000555,0.0336,"loglinear","Cytokine Signaling, Growth Factor Signaling","NS_HS_MYELOID_V2.0","STAT5A","mRNA",0,"","Growth Factor Signaling	Cytokine Signaling","hsa04012	hsa04630	hsa04917	hsa04933	hsa05161	hsa05162	hsa05166	hsa05200	hsa05203	hsa05220	hsa05221","","STAT5A","slateblue2",16,5.21191294387171
STAT6-mRNA,0.287,0.217,-0.139,0.712,1.22,0.908,1.64,0.219,1,"lm.nb","Growth Factor Signaling, Pathogen Response","NS_HS_MYELOID_V2.0","STAT6","mRNA",0,"","Pathogen Response	Growth Factor Signaling","hsa04630	hsa05161	hsa05321","","STAT6","azure4",1,1.32258064516129
SYK-mRNA,-0.484,0.143,-0.764,-0.203,0.715,0.589,0.869,0.00817,0.25,"lm.nb","Antigen Presentation, Cytokine Signaling, Fc Receptor Signaling, Growth Factor Signaling, Lymphocyte activation","NS_HS_MYELOID_V2.0","SYK","mRNA",0,"","Lymphocyte activation	Growth Factor Signaling	Fc Receptor Signaling	Cytokine Signaling	Antigen Presentation","hsa04064	hsa04072	hsa04151	hsa04380	hsa04611	hsa04650	hsa04662	hsa04664	hsa04666	hsa05152	hsa05169	hsa05203","","SYK","slateblue4",16,-3.38461538461538
TGFB1-mRNA,0.109,0.169,-0.222,0.441,1.08,0.857,1.36,0.534,1,"lm.nb","Cell Migration and Adhesion, ECM remodeling, Growth Factor Signaling","NS_HS_MYELOID_V2.0","TGFB1","mRNA",0,"","Growth Factor Signaling	ECM remodeling	Cell Migration and Adhesion","hsa04010	hsa04060	hsa04068	hsa04110	hsa04144	hsa04350	hsa04380	hsa04390	hsa04672	hsa04932	hsa04933	hsa05140	hsa05142	hsa05144	hsa05145	hsa05146	hsa05152	hsa05161	hsa05166	hsa05200	hsa05205	hsa05210	hsa05211	hsa05212	hsa05220	hsa05321	hsa05323	hsa05410	hsa05414","","TGFB1","azure4",1,0.644970414201183
TLR1-mRNA,0.764,0.466,-0.15,1.68,1.7,0.902,3.2,0.136,1,"lm.nb","TLR signaling","NS_HS_MYELOID_V2.0","TLR1","mRNA",0,"","TLR signaling","hsa04620	hsa05152","","TLR1","azure4",1,1.63948497854077
TLR10-mRNA,0.92,0.504,-0.0682,1.91,1.89,0.954,3.75,0.101,1,"lm.nb","TLR signaling","NS_HS_MYELOID_V2.0","TLR10","mRNA",0,"","TLR signaling","","","TLR10","azure4",1,1.82539682539683
TLR2-mRNA,0.79,0.399,0.00776,1.57,1.73,1.01,2.97,0.0791,1,"lm.nb","Growth Factor Signaling, TLR signaling","NS_HS_MYELOID_V2.0","TLR2","mRNA",0,"","TLR signaling	Growth Factor Signaling","hsa04145	hsa04151	hsa04620	hsa05134	hsa05140	hsa05142	hsa05144	hsa05145	hsa05146	hsa05152	hsa05161	hsa05162	hsa05168	hsa05205	hsa05321	hsa05323","","TLR2","azure4",1,1.97994987468672
TLR3-mRNA,1.38,1.24,-1.06,3.82,2.6,0.48,14.1,0.3,1,"Wald","Pathogen Response, TLR signaling","NS_HS_MYELOID_V2.0","TLR3","mRNA",0,"","TLR signaling	Pathogen Response","hsa04620	hsa05160	hsa05161	hsa05164	hsa05168","","TLR3","azure4",1,1.11290322580645
TLR6-mRNA,0.839,0.47,-0.0824,1.76,1.79,0.944,3.39,0.108,1,"lm.nb","TLR signaling","NS_HS_MYELOID_V2.0","TLR6","mRNA",0,"","TLR signaling","hsa04145	hsa04620	hsa05142	hsa05152","","TLR6","azure4",1,1.78510638297872
TLR7-mRNA,0.887,1.92,-2.88,4.65,1.85,0.136,25.1,0.656,1,"Wald","TLR signaling","NS_HS_MYELOID_V2.0","TLR7","mRNA",0,"","TLR signaling","hsa04620	hsa05162	hsa05164","","TLR7","azure4",1,0.461979166666667
TLR8-mRNA,0.759,0.353,0.0677,1.45,1.69,1.05,2.73,0.0598,1,"lm.nb","TLR signaling","NS_HS_MYELOID_V2.0","TLR8","mRNA",0,"","TLR signaling","hsa04620","","TLR8","azure4",1,2.15014164305949
TNF-mRNA,-0.162,0.385,-0.916,0.592,0.894,0.53,1.51,0.684,1,"lm.nb","Antigen Presentation, Cytokine Signaling, Growth Factor Signaling, Pathogen Response, TH1 Activation, TLR signaling","NS_HS_MYELOID_V2.0","TNF","mRNA",0,"","TLR signaling	TH1 Activation	Pathogen Response	Growth Factor Signaling	Cytokine Signaling	Antigen Presentation","hsa04010	hsa04060	hsa04064	hsa04071	hsa04150	hsa04210	hsa04350	hsa04380	hsa04612	hsa04620	hsa04621	hsa04622	hsa04640	hsa04650	hsa04660	hsa04664	hsa04668	hsa04920	hsa04930	hsa04931	hsa04932	hsa04933	hsa04940	hsa05010	hsa05014	hsa05133	hsa05134	hsa05140	hsa05142	hsa05143	hsa05144	hsa05145	hsa05146	hsa05152	hsa05160	hsa05161	hsa05164	hsa05166	hsa05168	hsa05205	hsa05310	hsa05321	hsa05322	hsa05323	hsa05330
TNFRSF1A-mRNA,0.463,0.263,-0.0515,0.978,1.38,0.965,1.97,0.112,1,"lm.nb","Cytokine Signaling, Growth Factor Signaling","NS_HS_MYELOID_V2.0","TNFRSF1A","mRNA",0,"","Growth Factor Signaling	Cytokine Signaling","hsa04010	hsa04060	hsa04064	hsa04071	hsa04210	hsa04380	hsa04668	hsa04920	hsa04931	hsa04932	hsa05010	hsa05014	hsa05142	hsa05145	hsa05152	hsa05160	hsa05164	hsa05166	hsa05168","","TNFRSF1A","azure4",1,1.76045627376426
TNFSF10-mRNA,0.803,0.443,-0.0648,1.67,1.74,0.956,3.18,0.103,1,"lm.nb","Cytokine Signaling","NS_HS_MYELOID_V2.0","TNFSF10","mRNA",0,"","Cytokine Signaling","hsa04060	hsa04068	hsa04210	hsa04650	hsa05162	hsa05164","","TNFSF10","azure4",1,1.81264108352144
TRAF6-mRNA,-0.0694,0.106,-0.277,0.138,0.953,0.826,1.1,0.528,1,"lm.nb","Antigen Presentation, Cytokine Signaling, Fc Receptor Signaling, Growth Factor Signaling, Lymphocyte activation, Pathogen Response, TLR signaling","NS_HS_MYELOID_V2.0","TRAF6","mRNA",0,"","TLR signaling	Pathogen Response	Lymphocyte activation	Growth Factor Signaling	Fc Receptor Signaling	Cytokine Signaling	Antigen Presentation","hsa04010	hsa04064	hsa04120	hsa04144	hsa04380	hsa04620	hsa04621	hsa04622	hsa04722	hsa05133	hsa05140	hsa05142	hsa05145	hsa05152	hsa05160	hsa05162	hsa05168	hsa05169	hsa05200	hsa05222","","TRAF6","azure4",1,-0.654716981132076
[truncated: 25 more columns]
